# Supplementary material for: Anxiety, Insomnia, and Memory Impairment in Metabolic Syndrome Rats Are Alleviated by the Novel Functional Ingredients from Anacardium occidentale
Source: MDPI journal article supplement (doi:10.3390/antiox11112203), 2022-11-07
Supplement: s1 [file s1]

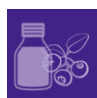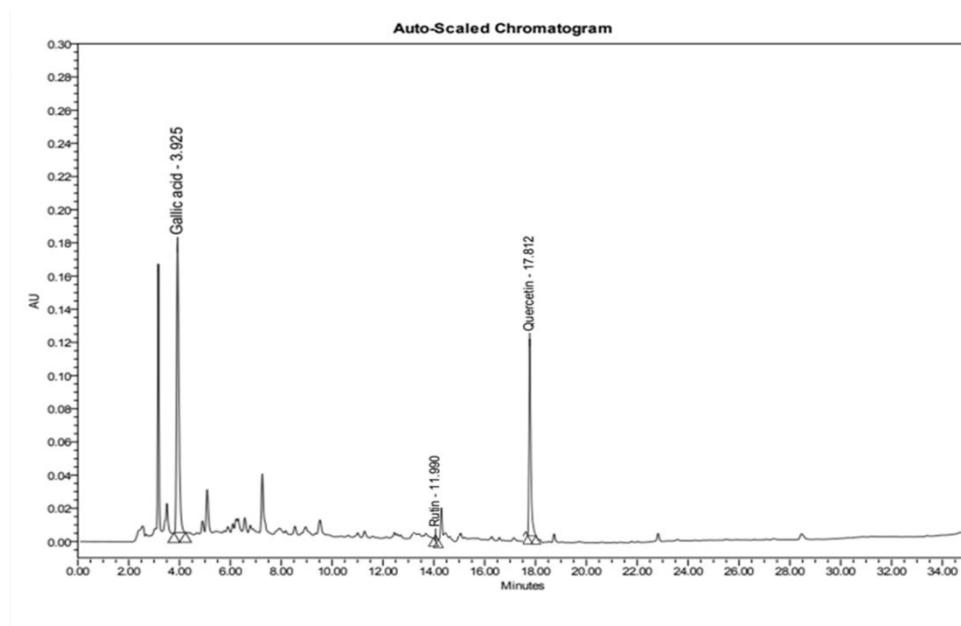

**Figure S1.** The fingerprint chromatogram of the cashew leaves -extract plus cashew apple pomace-derived fiber (AO). Using Purospher®STAR, C-18 encapped (5µm), LiChroCART®250-4.6 and HPLC-Cartridge, Sorbet Lot No. HX255346 (Merk, Germany) with guard column (Merk, Germany).

**Table S1.** Effect of the functional ingredients consisting of cashew leaf extract and a.cashew apple pomace-derived dietary fiber (AO) on the growth of *Lactobacillus* spp.

| Treatment Group      | <i>Lactobacillus</i> spp.<br>(%Change) |
|----------------------|----------------------------------------|
| HFHC+Vehicle         | 1.044±0.05                             |
| HFHC+ leaves extract | 5.353±0.31                             |
| HFHC+Fiber           | 156.087±4.35 ***                       |
| HFHC+AO2             | 195.032±3.18 ***                       |
| F-test,p-value       | F(5,19) = 369.05,<br>p-value< 0.0001   |

Data are presented as mean ± SEM (n=6/group). \*\*\* p-value<0.001; compared to vehicle.

**Table S2.** Effect of the functional ingredients consisting of cashew leaf extract and a.cashew apple pomace-derived dietary fiber (AO) on the growth of *Bifidobacterium* spp.

| Treatment Group      | <i>Bifidobacterium</i> spp.<br>(%Change) |
|----------------------|------------------------------------------|
| HFHC+Vehicle         | 0.411±0.02                               |
| HFHC+ leaves extract | 9.594±0.27                               |
| HFHC+Fiber           | 38.913±1.82 ***                          |
| HFHC+AO2             | 52.466±1.50 ***                          |
| F-test,p-value       | F(5,19) = 253.16,<br>p-value< 0.001      |

Data are presented as mean ± SEM (n=6/group). \*\*\* p-value<0.001; compared to vehicle.

**Table S3.** Effect of the functional ingredient containing cashew leaves extract and cashew apple pomace-derived dietary fiber (AO) on body weights. Data are presented as mean  $\pm$  SEM )n=6/group.

| Treatment Group              | Body Weights (g)                  |                                     |                                    |
|------------------------------|-----------------------------------|-------------------------------------|------------------------------------|
|                              | 1-Day                             | 7-Day                               | 14-Day                             |
| Naïve control                | 488.25 $\pm$ 1.23                 | 496.75 $\pm$ 1.12                   | 494.25 $\pm$ 1.23                  |
| HFHC+Vehicle                 | 537.25 $\pm$ 2.43 <sup>aaa</sup>  | 597.25 $\pm$ 2.24 <sup>aaa</sup>    | 598.75 $\pm$ 2.20 <sup>aaa</sup>   |
| HFHC+Vitamin C (250 mg/kgBW) | 537.5 $\pm$ 2.46                  | 525.45 $\pm$ 2.34 <sup>***</sup>    | 517.50 $\pm$ 2.32 <sup>***</sup>   |
| HFHC+Diazepam (2 mg/kgBW)    | 536.75 $\pm$ 2.34                 | 606.52 $\pm$ 2.42                   | 599.54 $\pm$ 3.35                  |
| HFHC+Fluoxetine 20 mg/kg BW  | 537.89 $\pm$ 3.25                 | 585.75 $\pm$ 3.21                   | 579.87 $\pm$ 2.30                  |
| HFHC+Donepezil (1 mg/kg BW)  | 536.58 $\pm$ 2.77                 | 598.12 $\pm$ 3.25                   | 589.21 $\pm$ 3.12                  |
| HFHC+AO1 (1mg/kgBW)          | 536.50 $\pm$ 2.56                 | 530.64 $\pm$ 2.42 <sup>***</sup>    | 544.21 $\pm$ 3.20 <sup>***</sup>   |
| HFHC+AO2 (10 mg/kgBW)        | 536.75 $\pm$ 2.67                 | 542.25 $\pm$ 2.45 <sup>***</sup>    | 554.75 $\pm$ 2.41 <sup>***</sup>   |
| HFHC+AO3 (100 mg/kgBW)       | 537.5 $\pm$ 2.40                  | 564.75 $\pm$ 2.65 <sup>***</sup>    | 577.25 $\pm$ 2.34 <sup>**</sup>    |
| F-test,p-value               | F(7,47) = 2.41,<br>p-value< 0.001 | F(7,47) = 103.29,<br>p-value< 0.001 | F(7,47) = 68.43,<br>p-value< 0.001 |

Data are presented as mean  $\pm$  SEM (n=6/group). <sup>aaa</sup> p-value< 0.001, compared to naïve control which received ND and <sup>\*\*</sup>, <sup>\*\*\*</sup> p-value< 0.01, and 0.001, respectively; compared to metabolic syndrome rats which received HFHC and vehicle.
